# Supplementary material for: Characterization of spliced leader trans-splicing in a photosynthetic rhizarian amoeba, Paulinella micropora, and its possible role in functional gene transfer
Source: PLOS journal article supplement (doi:10.1371/journal.pone.0200961), 2018-07-19
Supplement: S7 (10.1371/journal.pone.0200961.s007) [file journal.pone.0200961.s007]

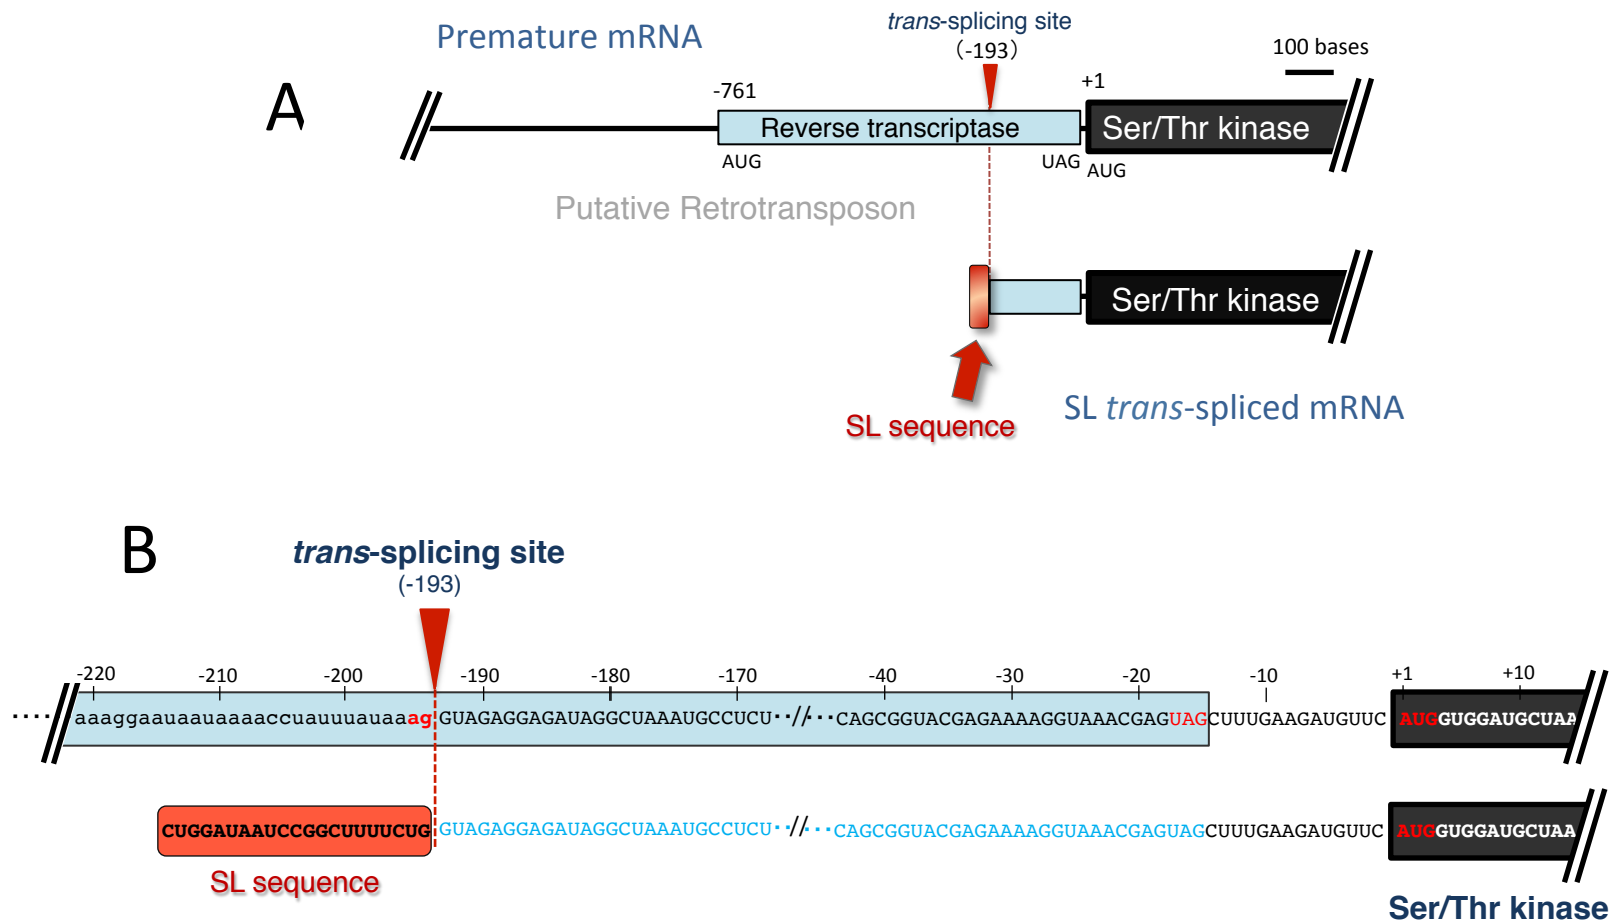

**S4 Fig. A case of SL *trans*-spliced mRNA rescued from the disturbance by the retrotransposon insertion just upstream of the coding region. A.** Schematic models of the premature and SL *trans*-spliced forms of the transcripts encoding a serine/threonine kinase. These RNA sequences were searched from the RNA-seq data of *P. micropora* obtained by Illumina HiSeq 4000. **B.** Nucleotide sequences covering the *trans*-splicing site and translation initiation context of the transcripts modeled in **A**, with the 3' splicing acceptor motif (AG), termination codon, and initiation codon shown by red characters.
